# Supplementary material for: Ruthenium hydroxide on magnetite as a magnetically separable heterogeneous catalyst for liquid-phase oxidation and reduction
Source: Royal Society of Chemistry journal article supplement (doi:10.1039/b603204d), 2006-01-01
Supplement: b603204d.pdf [file b603204d.pdf]

**Ruthenium hydroxide on magnetite as a magnetically separable heterogeneous catalyst for liquid-phase oxidations and reductions (B603204D)**

Miyuki Kotani, Takeshi Koike, Kazuya Yamaguchi and Noritaka Mizuno

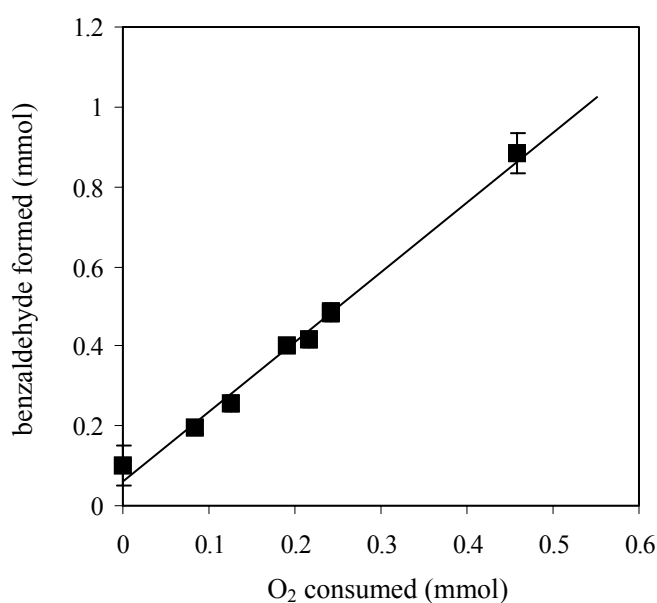

**Fig. S1** Relationship between amounts of benzaldehyde and O<sub>2</sub> uptake for the oxidation of benzyl alcohol. Reaction conditions: Benzyl alcohol (2 mmol), Ru(OH)<sub>x</sub>/Fe<sub>3</sub>O<sub>4</sub> (Ru: 0.03 mmol), toluene (3 mL), 378 K, O<sub>2</sub> atmosphere. Slope (benzaldehyde formed/) = 1.8 ( $r^2 = 0.99$ ).

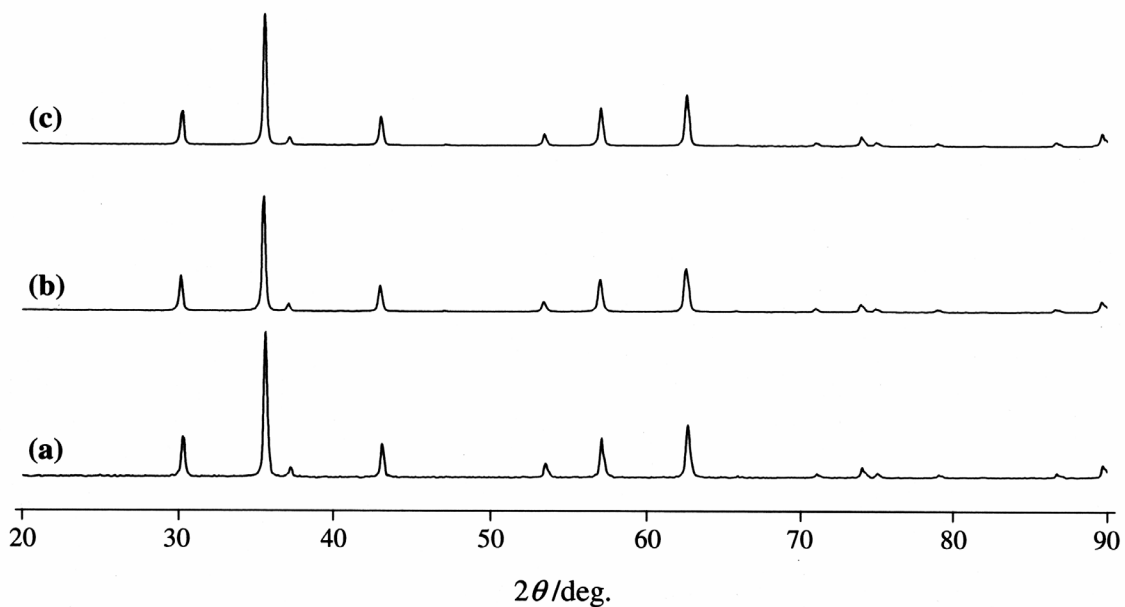

**Fig. S2** XRD patterns of  $\text{Ru(OH)}_x/\text{Fe}_3\text{O}_4$  catalysts; (a) fresh, (b) recovered after the oxidation of 1-phenylethanol and (c) recovered after the reduction of 3-pentanone.
